# Supplementary material for: Heteroleptic phenoxyimino tin(ii) bis(trimethylsilyl)amides for the synthesis of poly(diester-alt-ethers) from cyclohexene oxide and succinic anhydride
Source: Royal Society of Chemistry journal article supplement (doi:10.1039/d4dt03514c), 2025-01-01
Supplement: d4dt03514c1.pdf [file d4dt03514c1.pdf]

*Electronic Supplementary Information (ESI)*

*for*

**Heteroleptic phenoxyimino tin(II) bis(trimethylsilyl)amides for the synthesis of poly(diester-*alt*-ethers) from cyclohexene oxide and succinic anhydride**

Timothy Quek, Phongnarin Chumsaeng, and Khamphée Phomphrai\*

Department of Materials Science and Engineering, School of Molecular Science and Engineering, Vidyasirimedhi Institute of Science and Technology (VISTEC), Wangchan, Rayong 21210, Thailand, \*Email: khamphée.p@vistec.ac.th

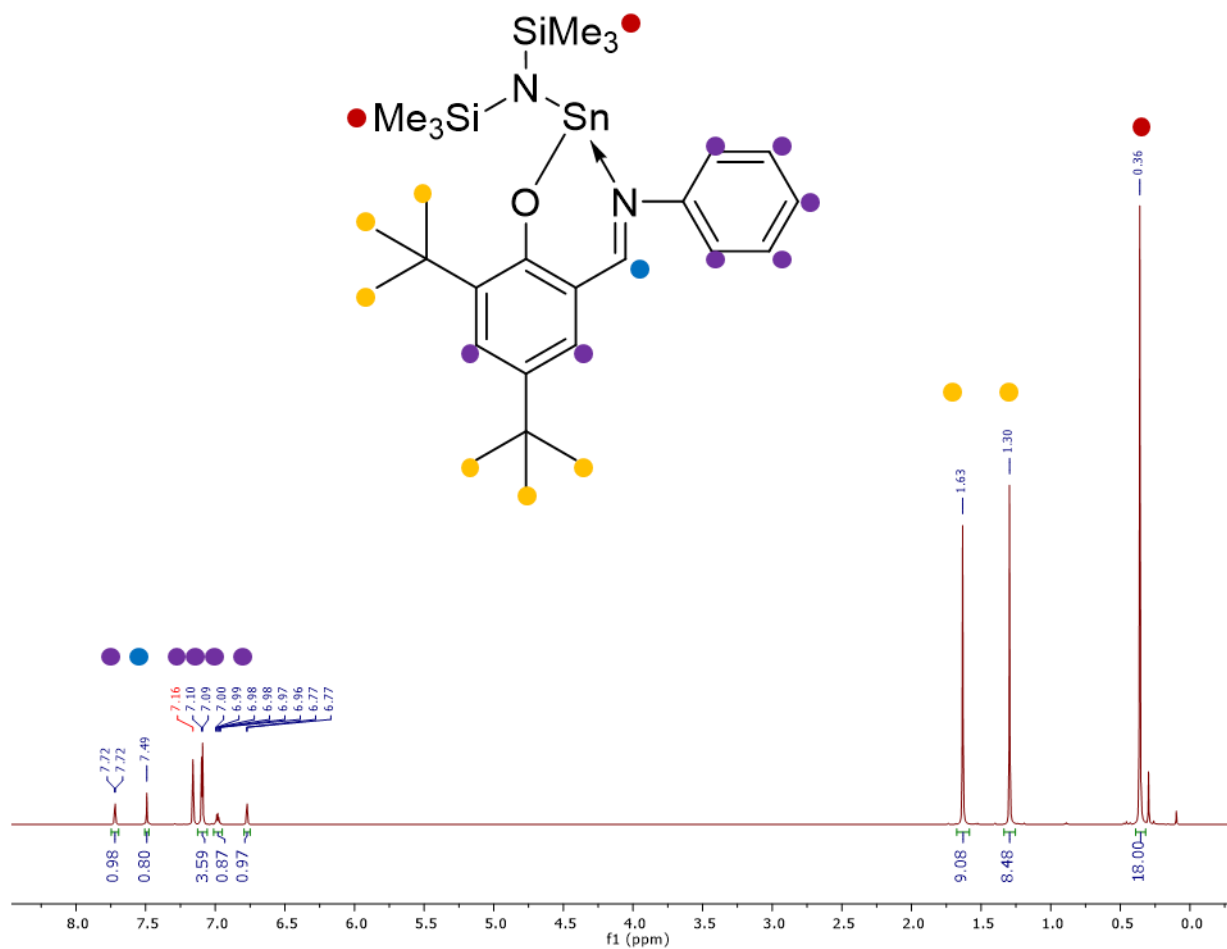

Fig. S1 <sup>1</sup>H NMR spectrum (600 MHz, C<sub>6</sub>D<sub>6</sub>, 30 °C) of Catalyst 1.

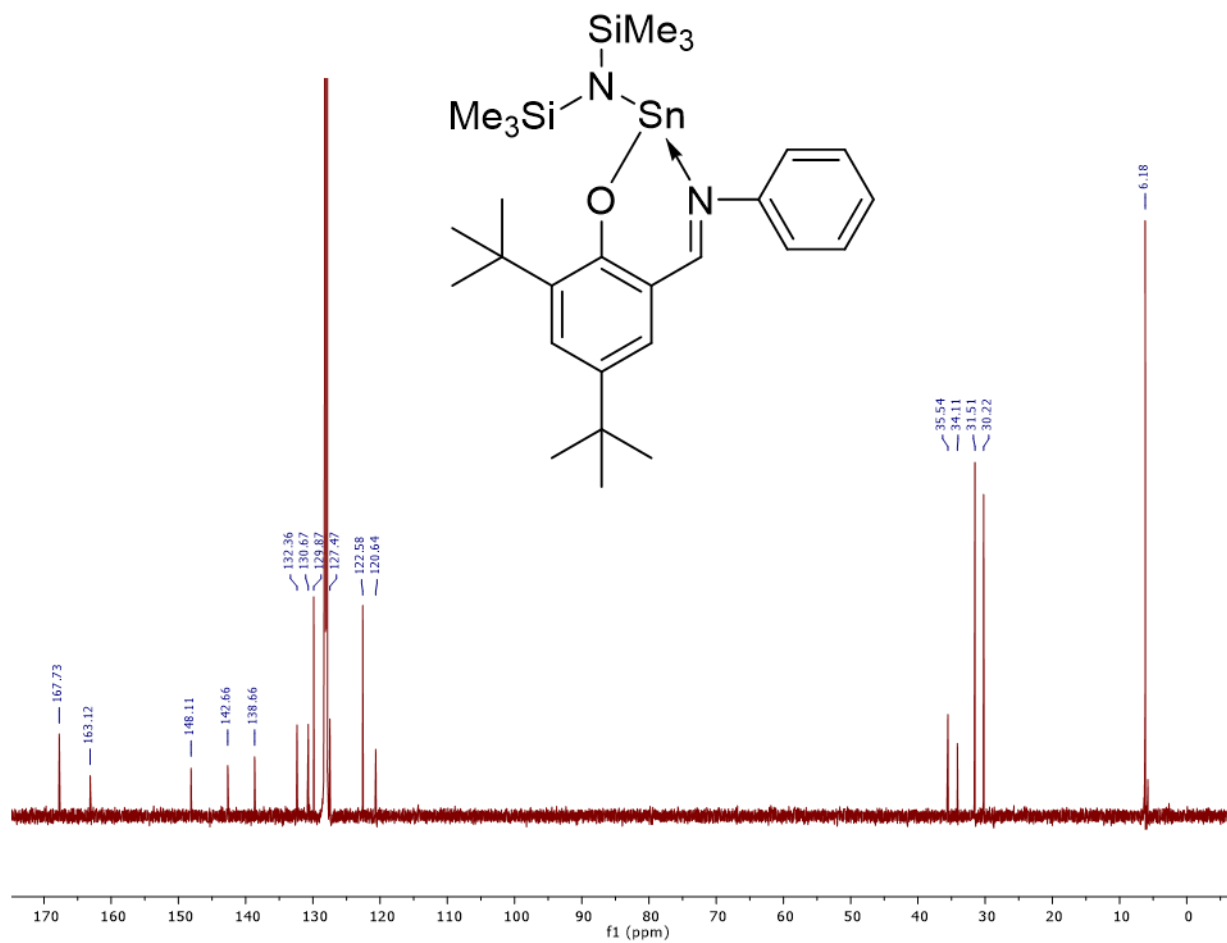

**Fig. S2** <sup>13</sup>C NMR spectrum (150 MHz, C<sub>6</sub>D<sub>6</sub>, 30 °C) of Catalyst **1**.

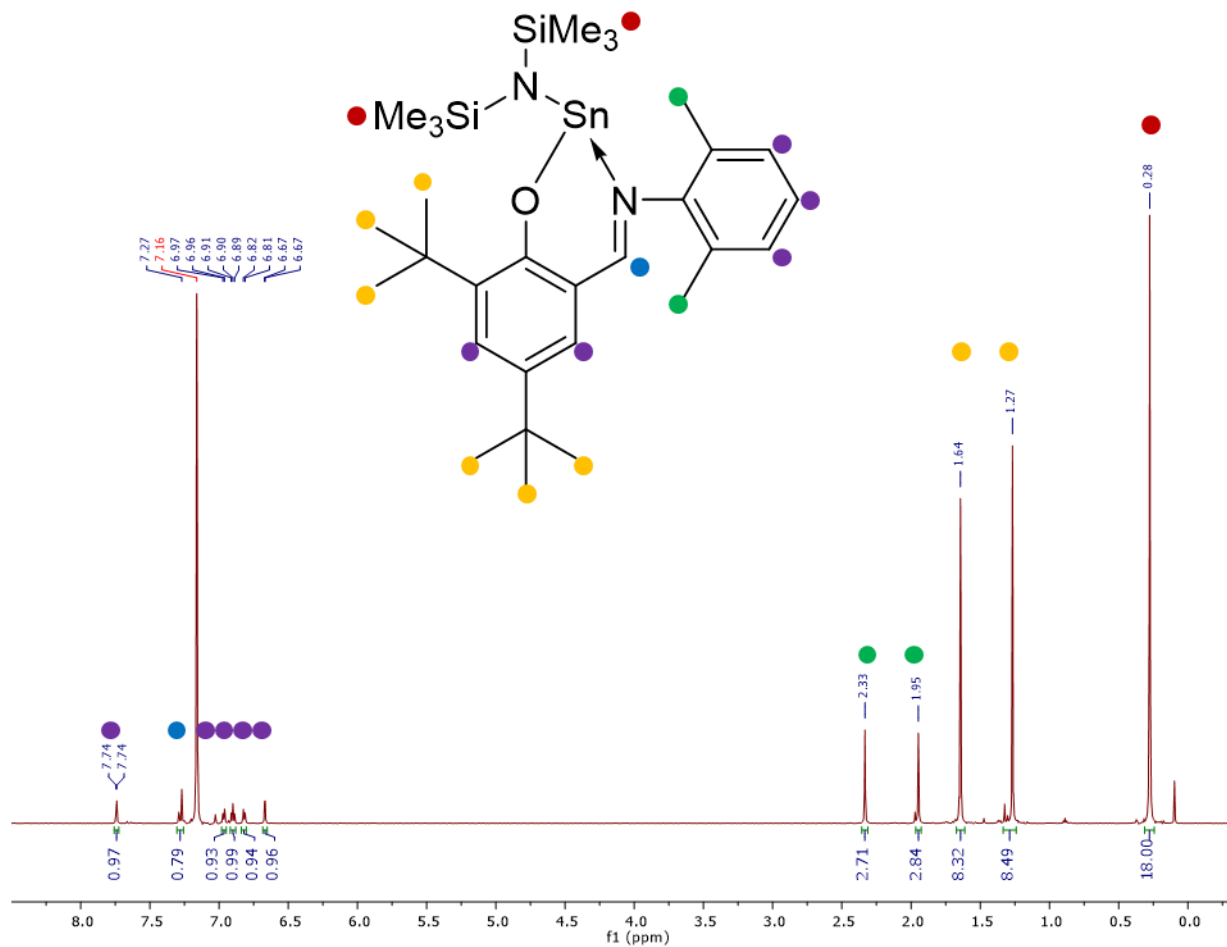

Fig. S3 <sup>1</sup>H NMR spectrum (600 MHz, C<sub>6</sub>D<sub>6</sub>, 30 °C) of Catalyst 2.

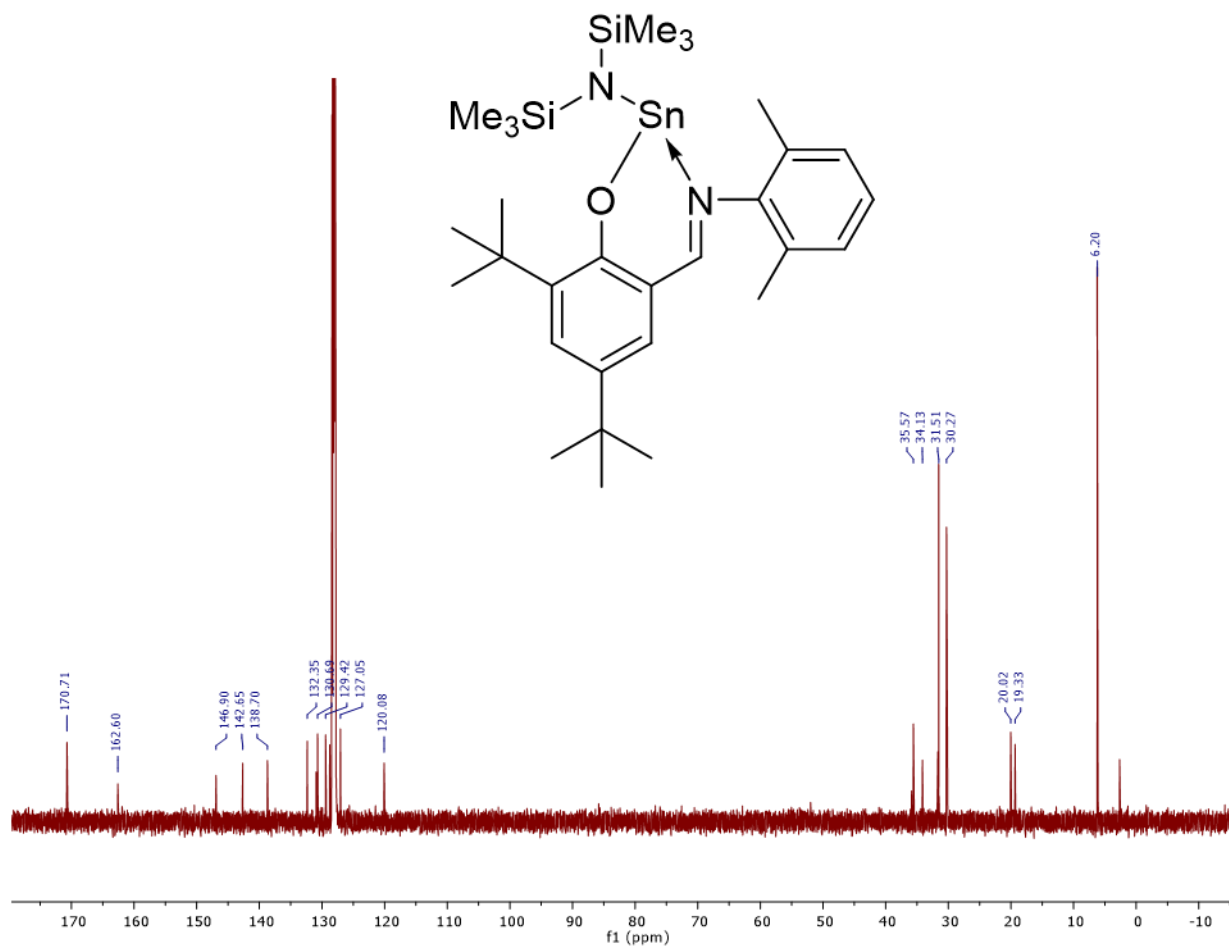

**Fig. S4**  $^{13}\text{C}$  NMR spectrum (150 MHz,  $\text{C}_6\text{D}_6$ , 30 °C) of Catalyst 2.

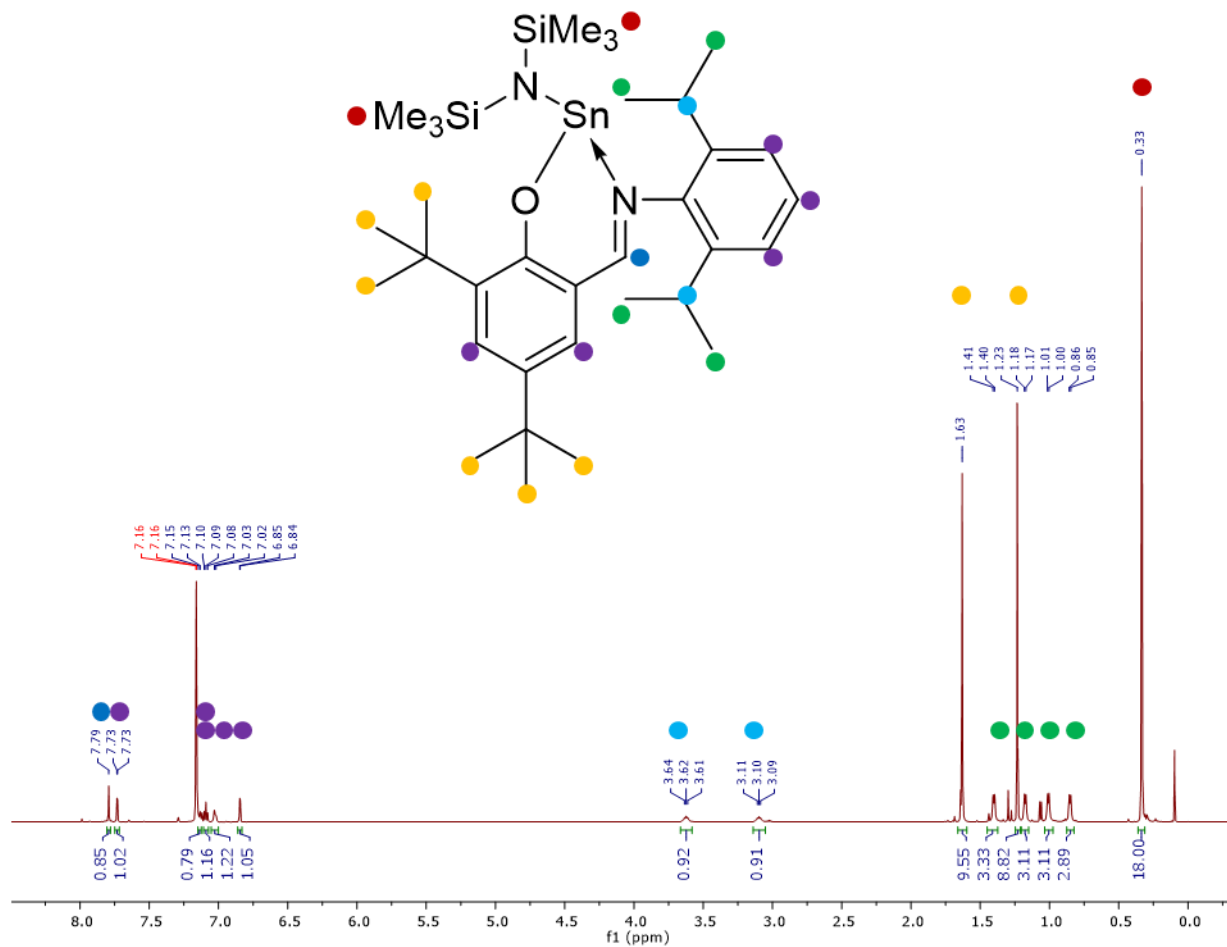

Fig. S5 <sup>1</sup>H NMR spectrum (600 MHz, C<sub>6</sub>D<sub>6</sub>, 30 °C) of Catalyst 3.

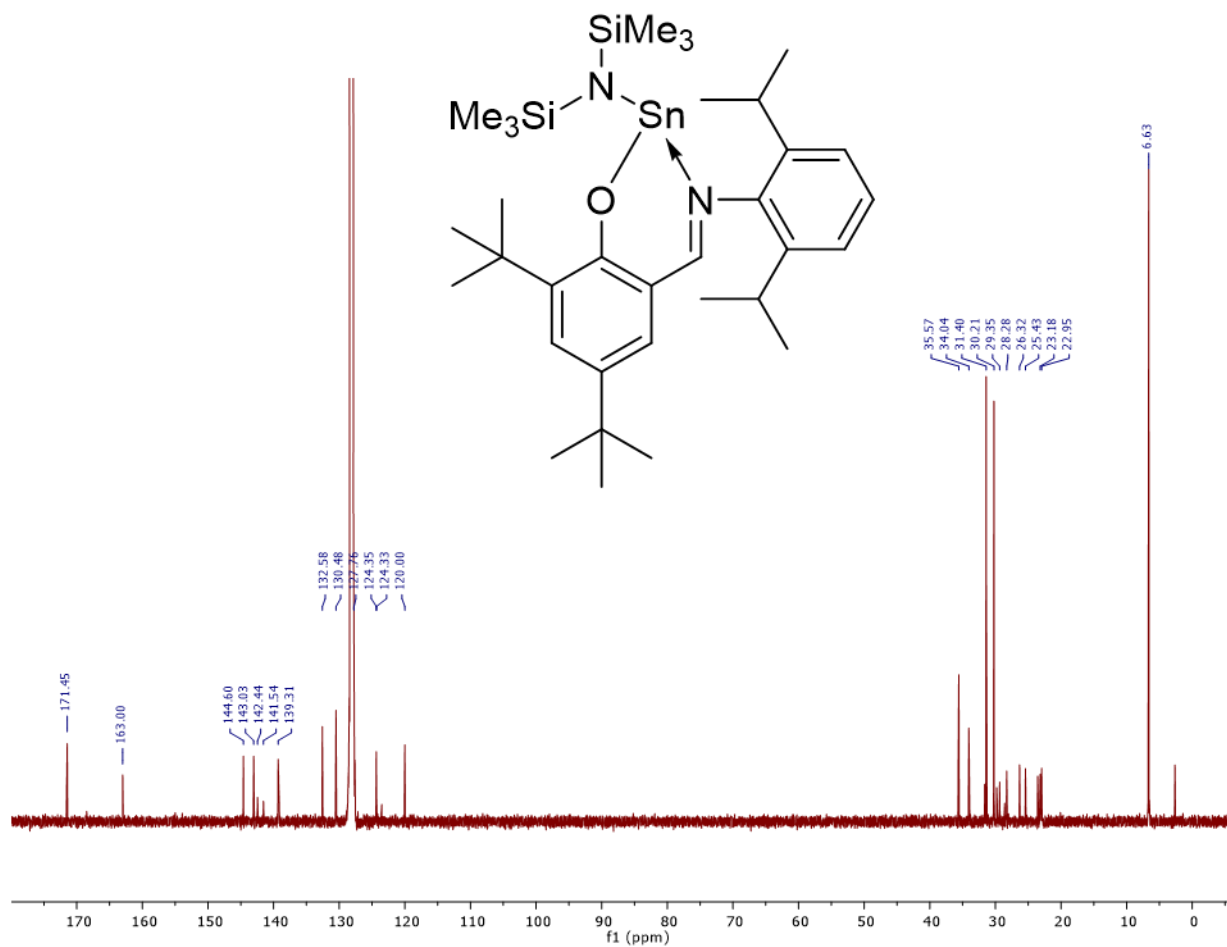

**Fig. S6** <sup>13</sup>C NMR spectrum (150 MHz, C<sub>6</sub>D<sub>6</sub>, 30 °C) of Catalyst **3**.

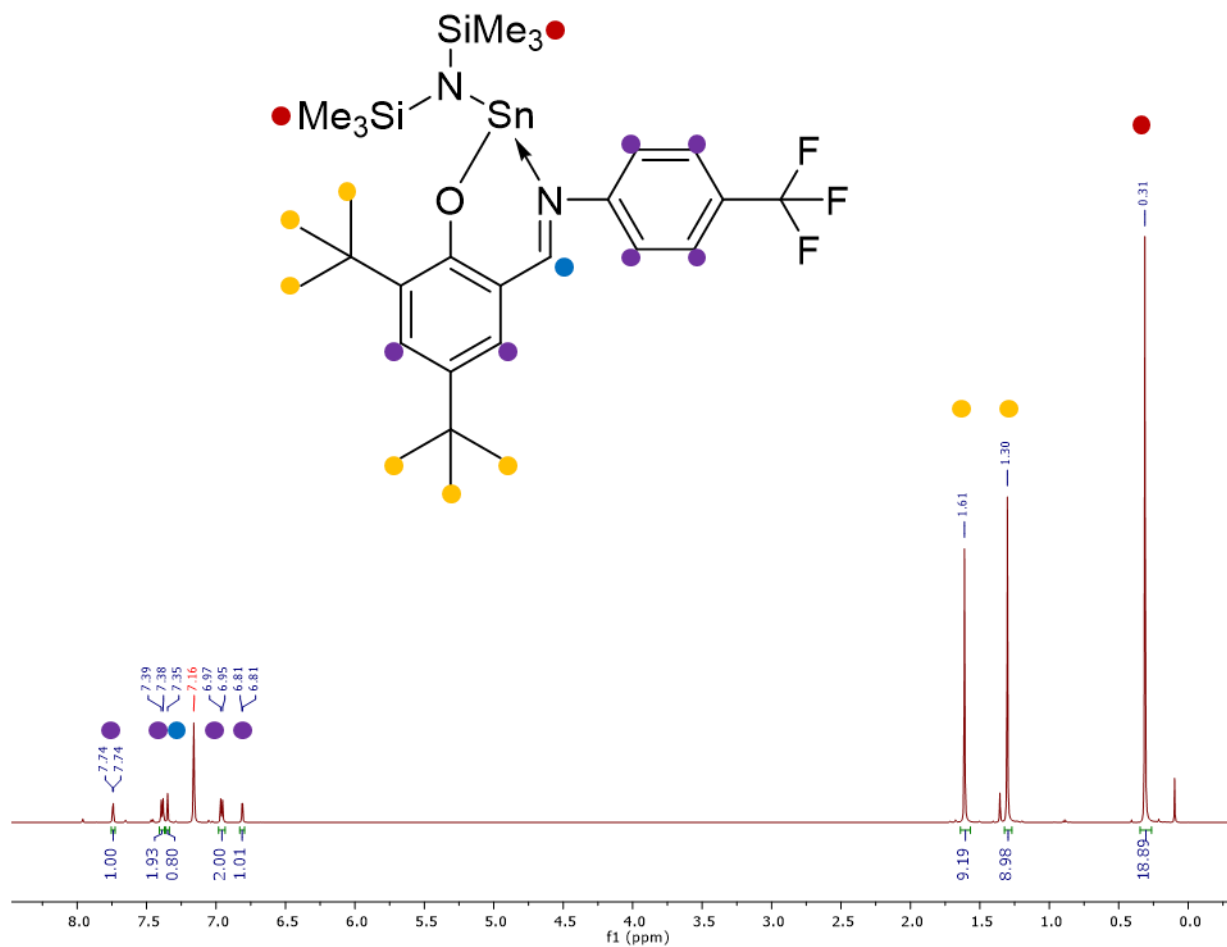

Fig. S7 <sup>1</sup>H NMR spectrum (600 MHz, C<sub>6</sub>D<sub>6</sub>, 30 °C) of Catalyst 4.



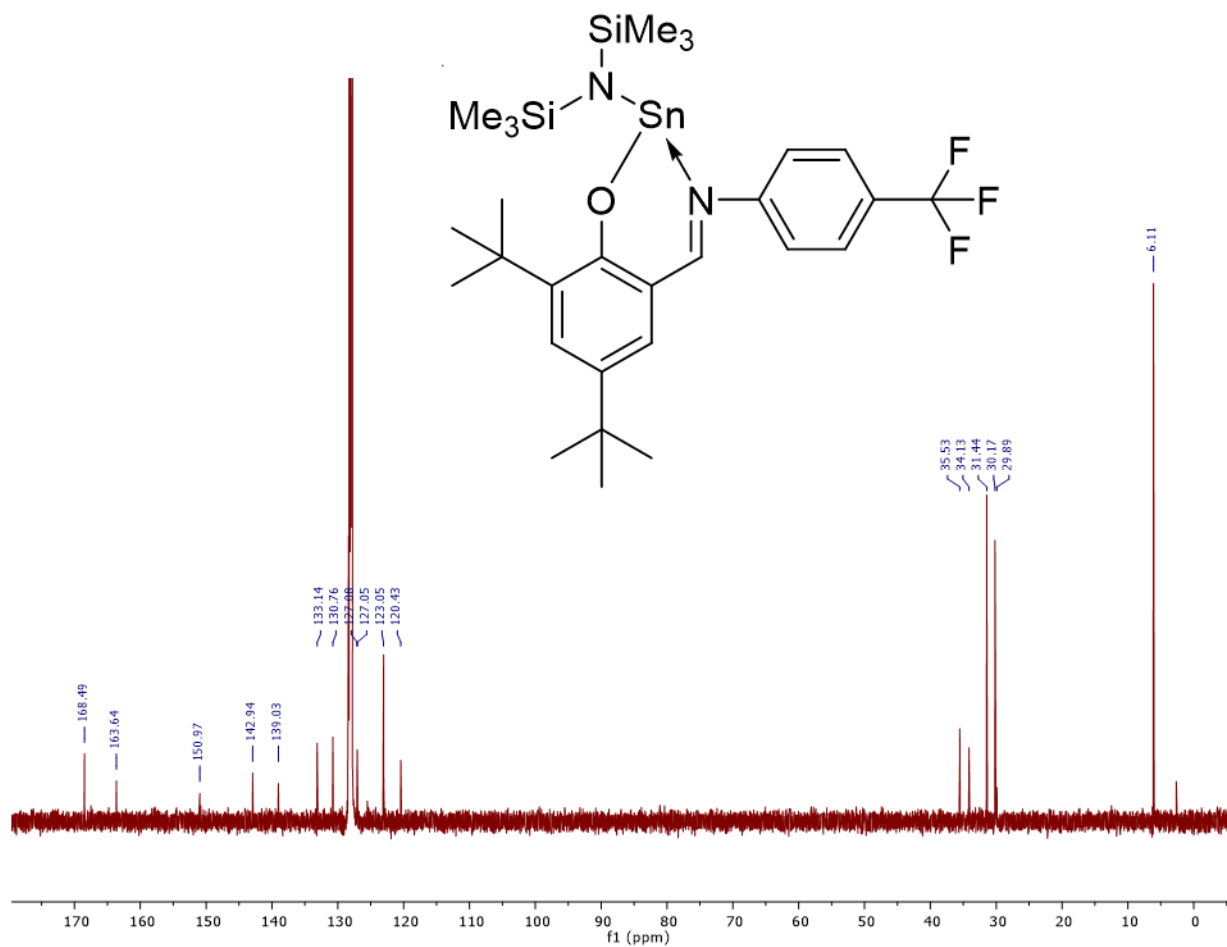

**Fig. S8** <sup>13</sup>C NMR spectrum (150 MHz, C<sub>6</sub>D<sub>6</sub>, 30 °C) of Catalyst 4.

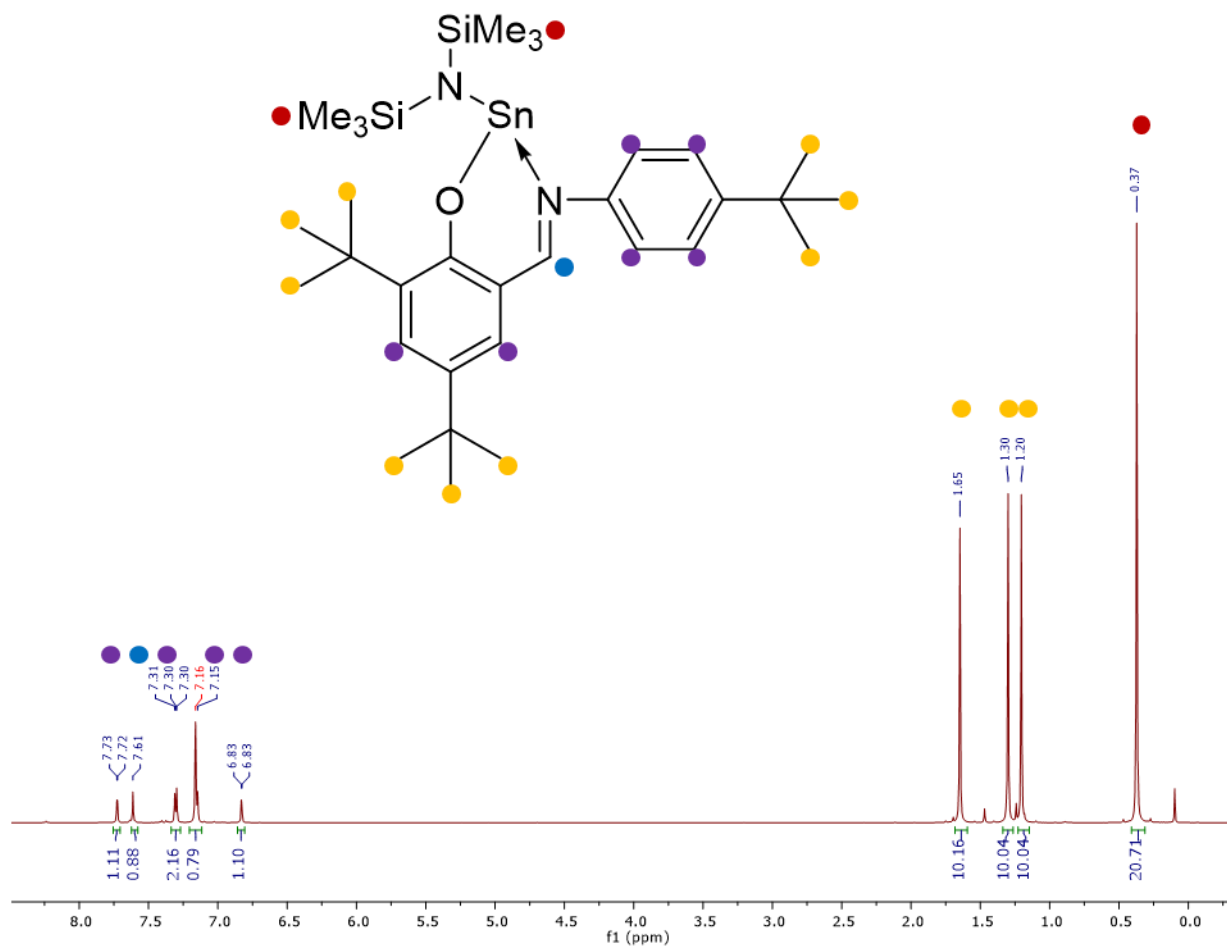

Fig. S9 <sup>1</sup>H NMR spectrum (600 MHz, C<sub>6</sub>D<sub>6</sub>, 30 °C) of Catalyst 5.

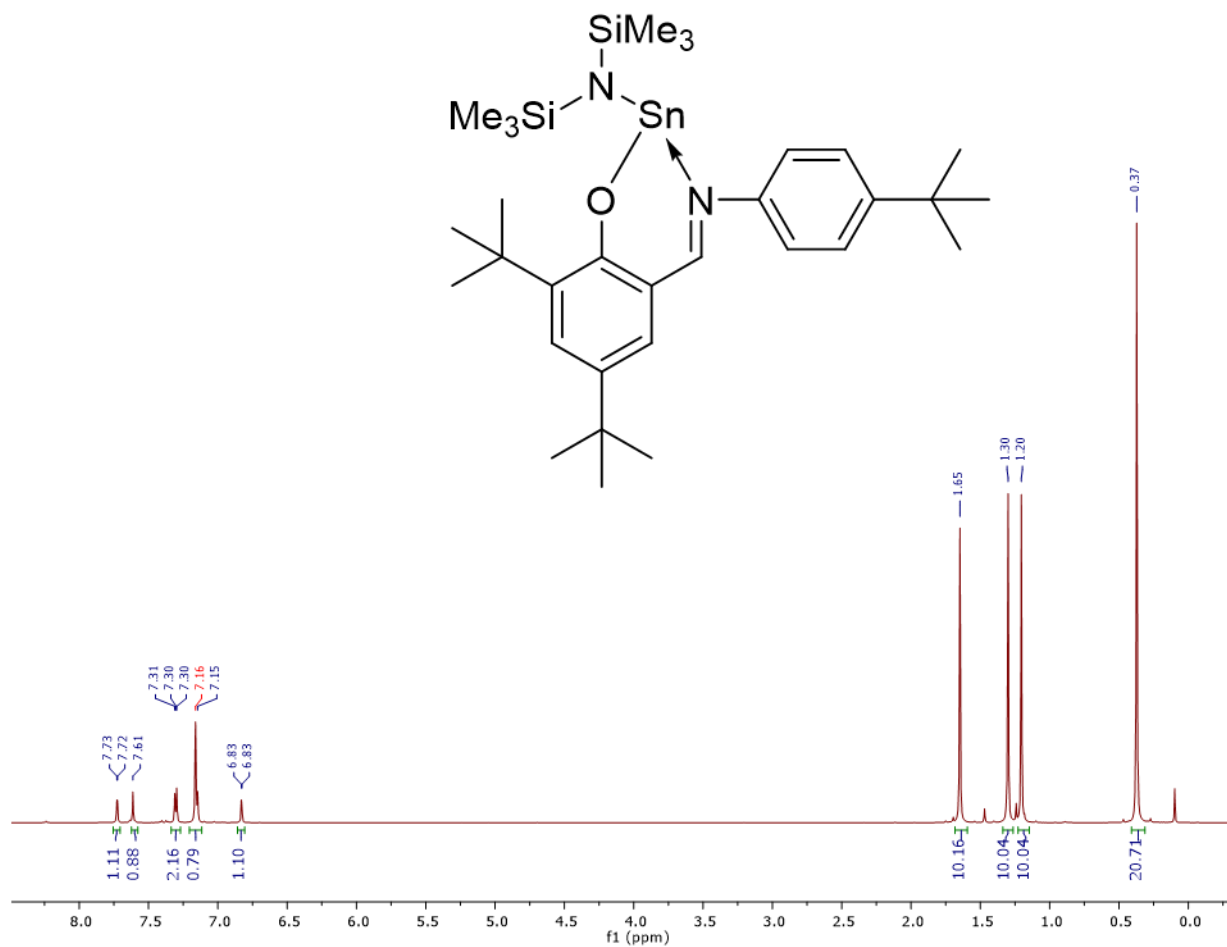

**Fig. S10** <sup>13</sup>C NMR spectrum (150 MHz, C<sub>6</sub>D<sub>6</sub>, 30 °C) of Catalyst 5.

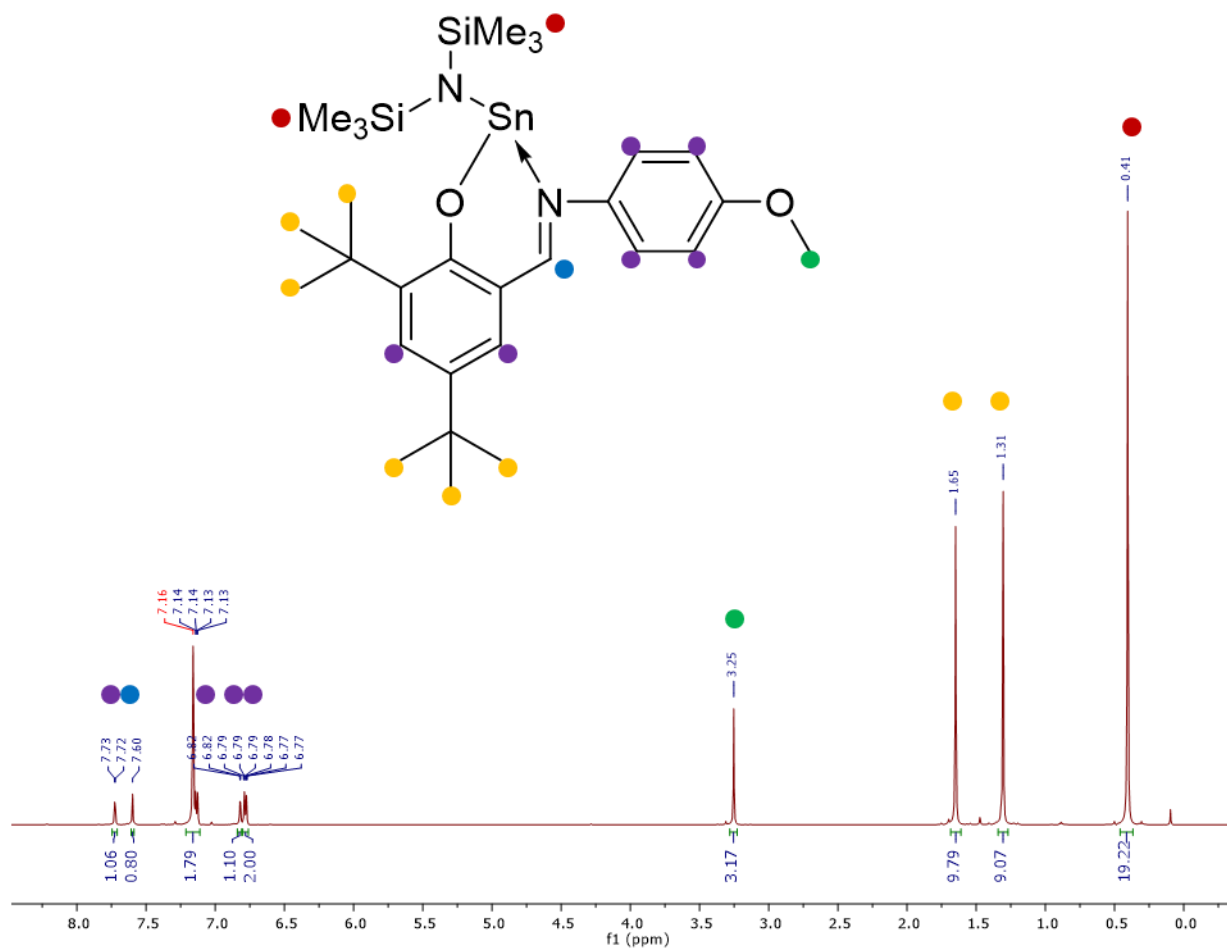

**Fig. S11** <sup>1</sup>H NMR spectrum (600 MHz, C<sub>6</sub>D<sub>6</sub>, 30 °C) of Catalyst 6.

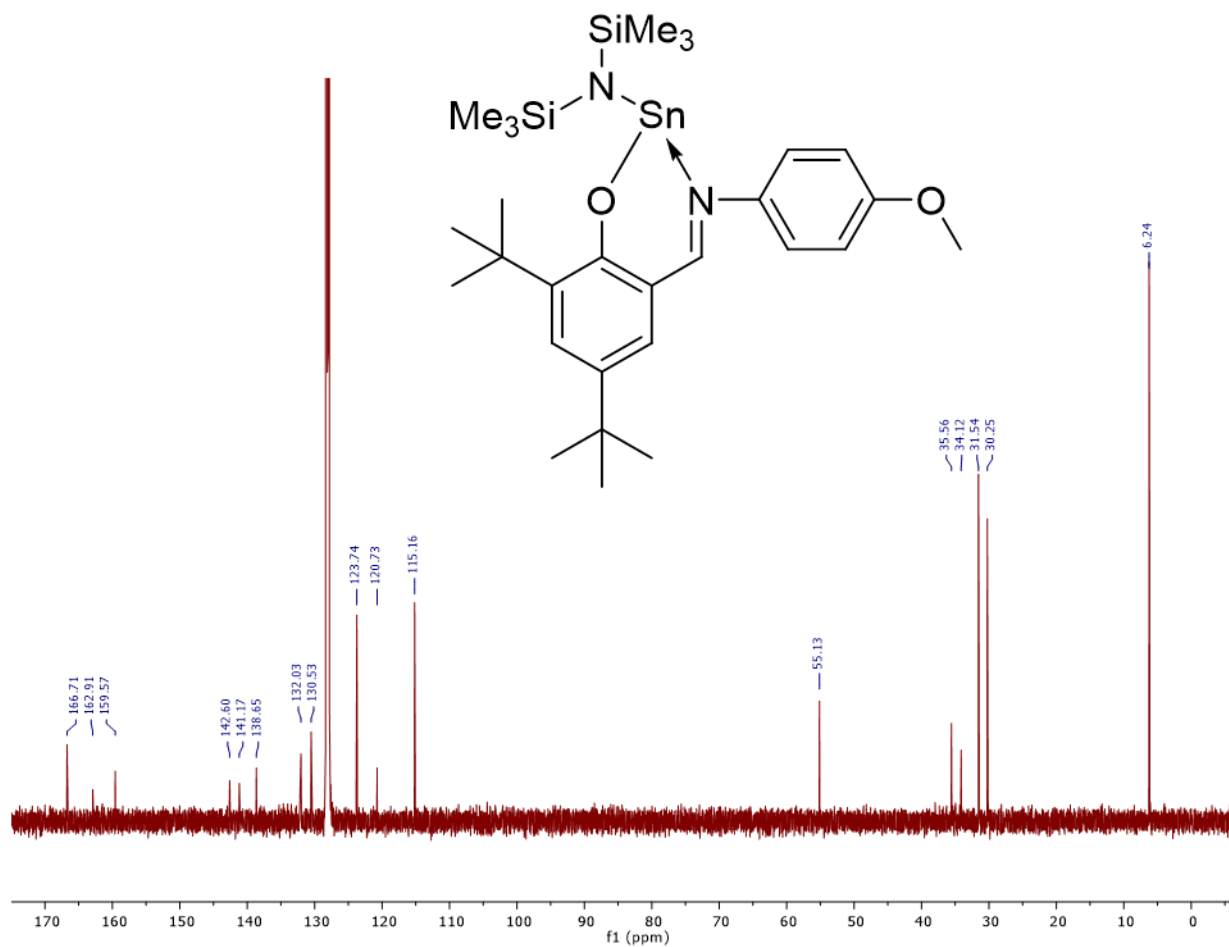

**Fig. S12**  $^{13}\text{C}$  NMR spectrum (150 MHz,  $\text{C}_6\text{D}_6$ , 30 °C) of Catalyst 6.

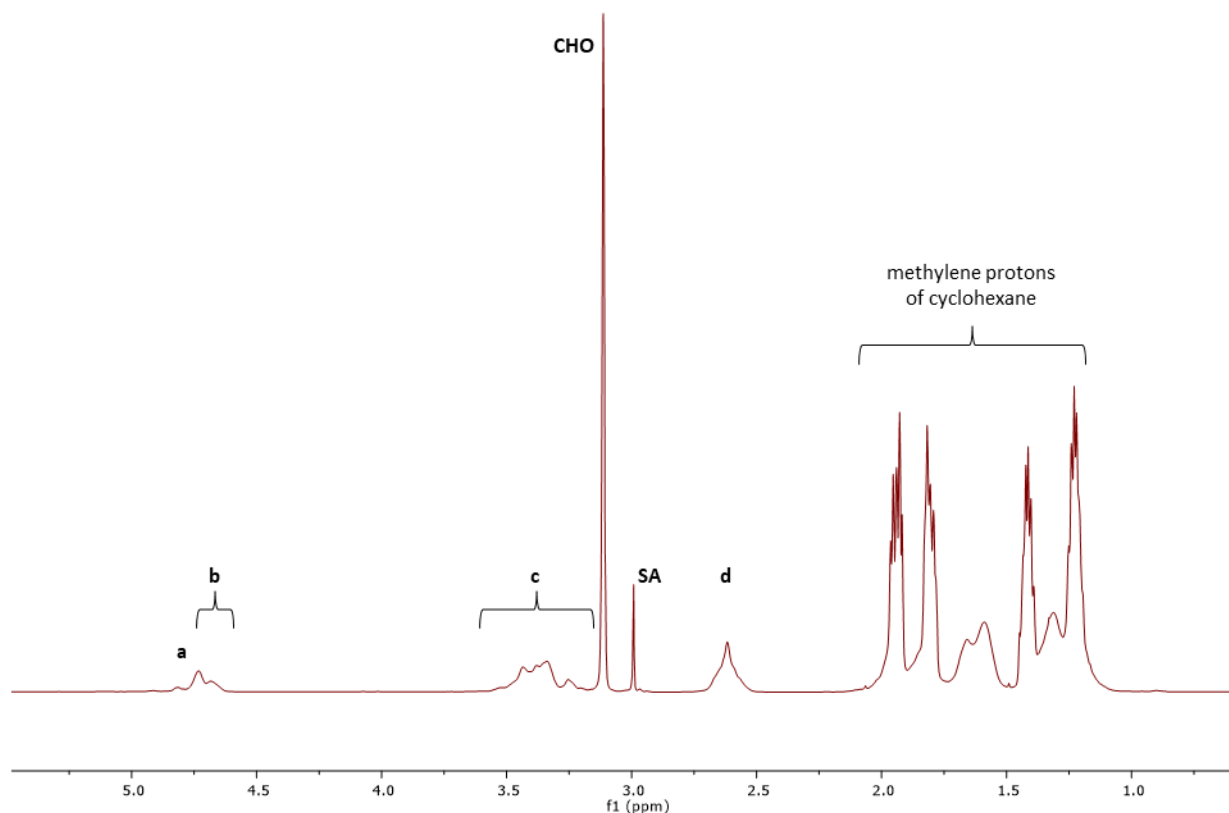

**Fig. S13** <sup>1</sup>H NMR spectrum (600 MHz, CDCl<sub>3</sub>, 30 °C) of crude product of a representative polymerisation reaction (Table 2, entry 3).

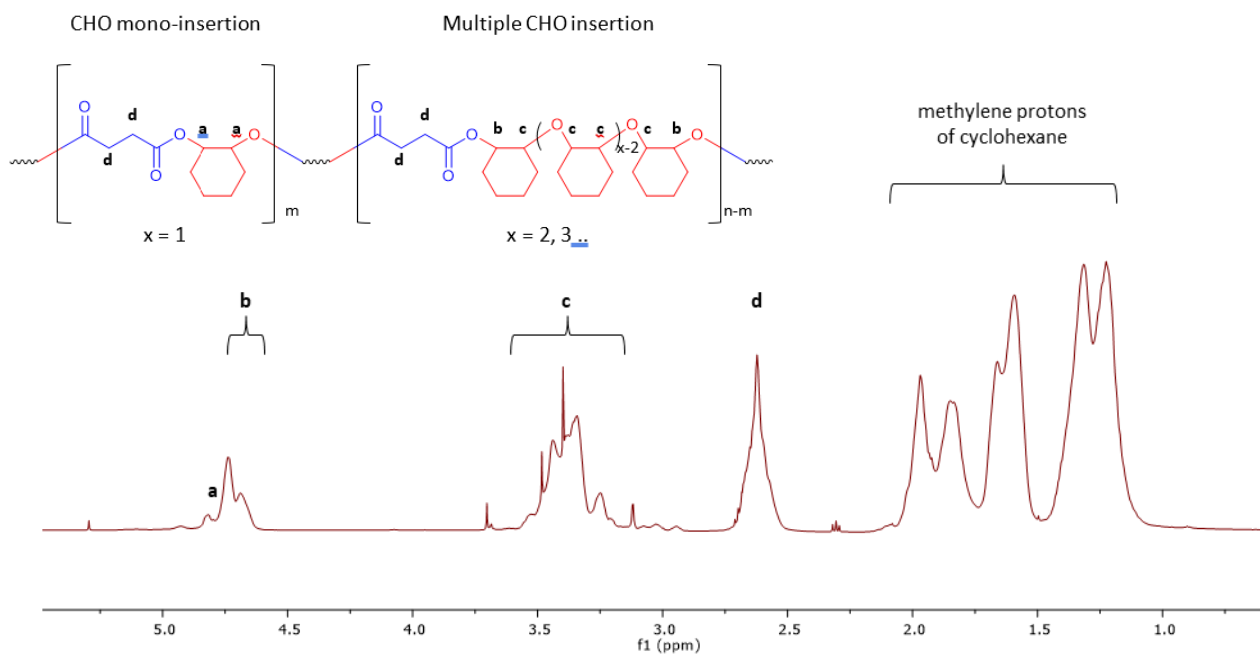

**Fig. S14** <sup>1</sup>H NMR spectrum (600 MHz, CDCl<sub>3</sub>, 30 °C) of representative isolated polymer (Table 2, entry 3).

## Method for the calculation of copolymer compositions from NMR data

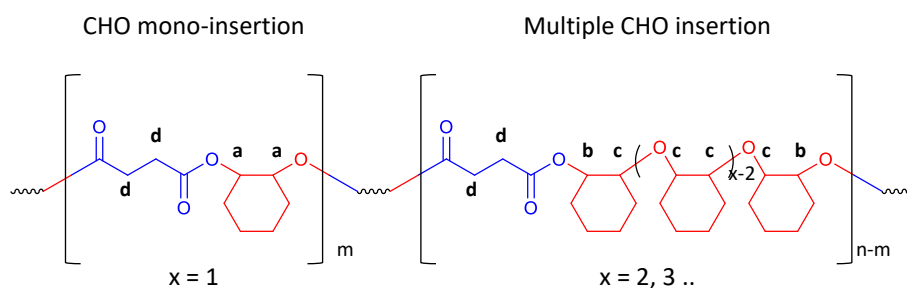

Take the NMR in Figure S13 as an example. From the crude sample (before polymer purification), we need to integrate for the peaks as shown below.

- a : This is the CH proton from CHO of the mono-insertion ( $x = 1$ ).
- b : This is the CH proton from CHO of the multiple CHO insertion at both ends.
- c : This is the CH proton from CHO connected by ether linkages.
- d : This is  $\text{CH}_2$  proton from SA in the polymer.
- SA : This is  $\text{CH}_2$  proton from unreacted SA monomer.
- CHO : This is CH proton from unreacted CHO monomer.

The incorporation ratio [B/A ratio] can be obtained by dividing the sum of the integrated CHO peaks by half that of SA, because the SA peaks correspond to four protons while only two protons per CHO are represented in the integrated sections.

$$\text{B/A ratio} = (a + b + c) / (d / 2)$$

SA conversion [convSA] is determined by dividing the signal of the polymerised SA (**d**) by the sum of monomer and polymerised SA signals:

$$\text{convSA} = d / (\text{SA} + d)$$

The degree of polymerisation [DP-SA] may be calculated by multiplying the loading ratio of each monomer to the catalyst:

$$\text{DP-SA} = \text{convSA} * \text{loadedSA}$$

Turnover frequency [TOF] of SA is calculated from the reaction time and the degree of polymerization of SA:

$$\text{TOF} = \text{DP-SA} / \text{time}$$

The degree of polymerisation of CHO can be found by multiplying that of SA with the incorporation ratio:

$$\text{DP-CHO} = \text{DP-SA} * \text{B/A ratio}$$

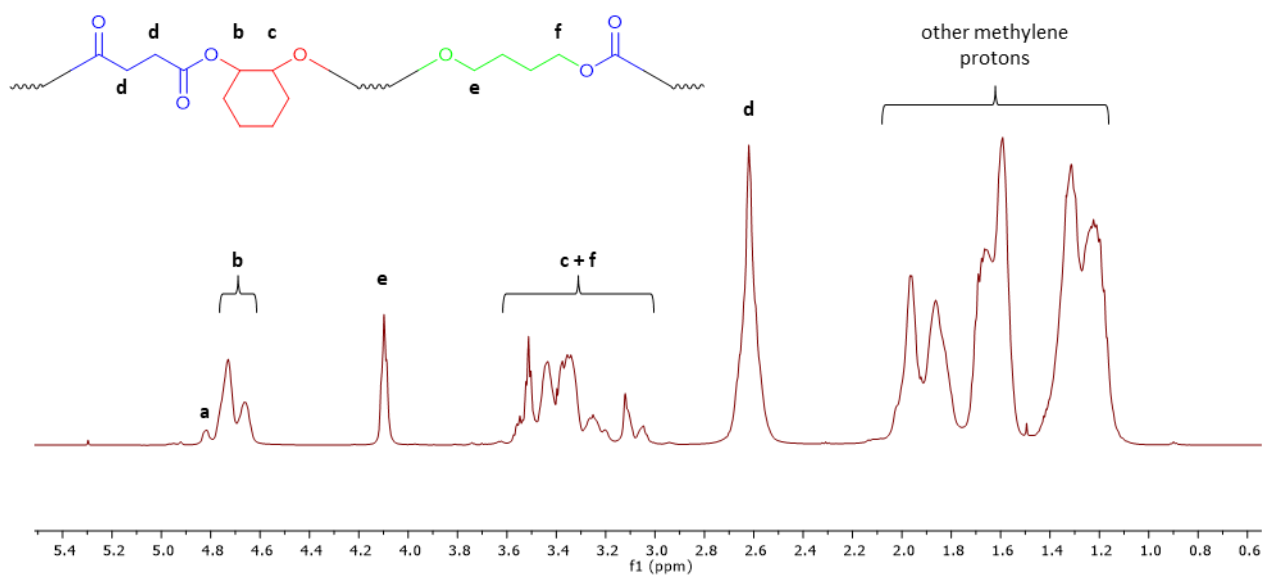

**Fig. S15**  $^1\text{H}$  NMR spectrum (600 MHz,  $\text{CDCl}_3$ , 30  $^\circ\text{C}$ ) of isolated terpolymer (Table 3, entry 1).

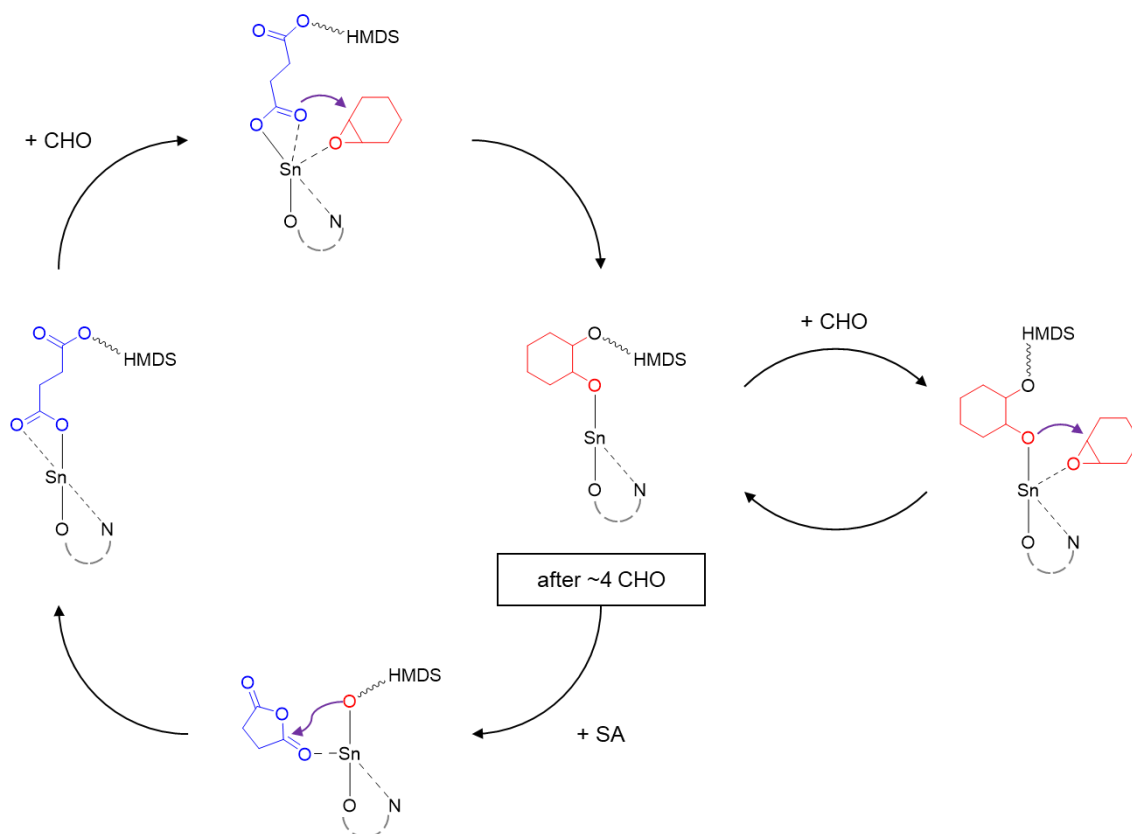

**Scheme S1** Proposed mechanism for the copolymerisation reaction.



## DOSY NMR

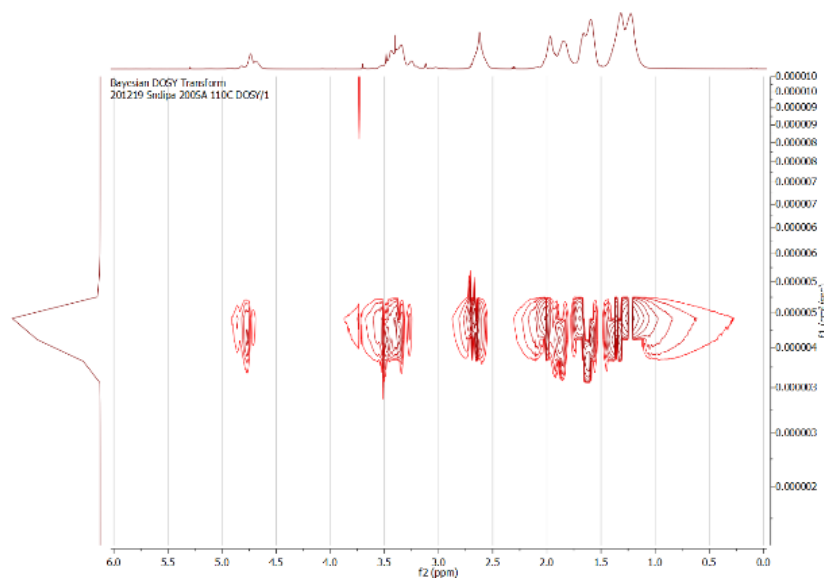

**Fig. S16** DOSY NMR spectrum of isolated polymer sample in  $\text{CDCl}_3$  (Table 2, entry 3).

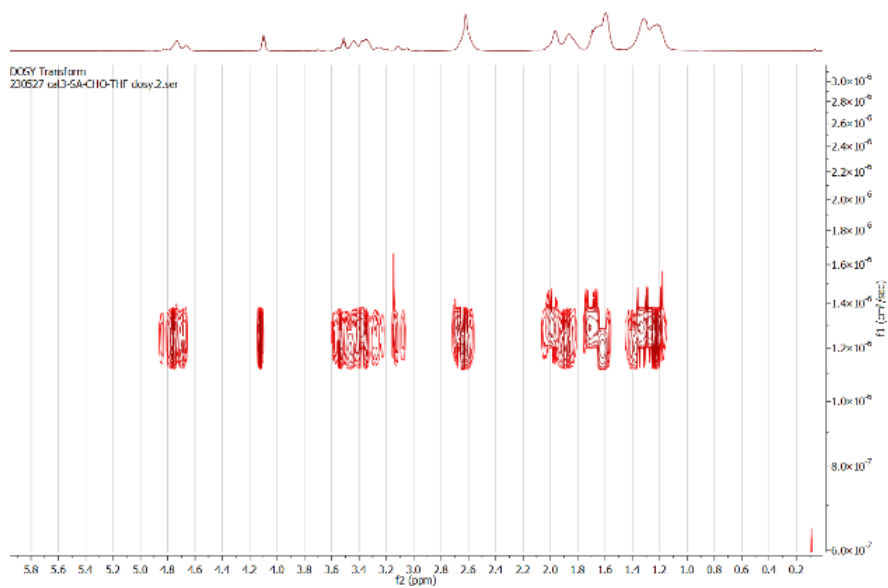

**Fig. S17** DOSY NMR spectrum of isolated ter-polymer in  $\text{CDCl}_3$  (Table 3, entry 1).

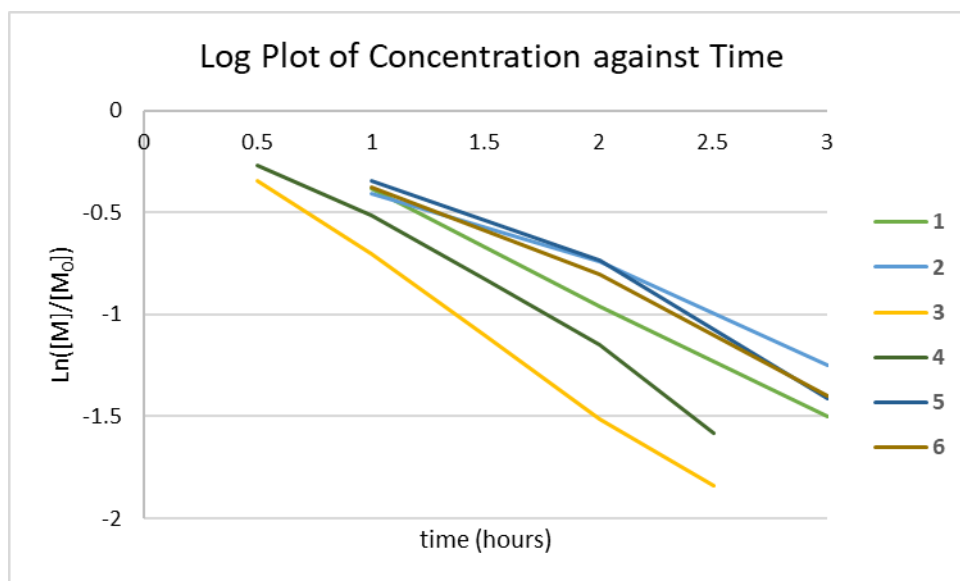

**Fig. S18** The SA consumption of the polymerisations described in Table 2, entries 1-6.

## Electrospray Ionisation – Mass Spectrometry

Samples of polymers were hydrolysed. The hydrolysis products were extracted from the organic layer and analysed by electrospray ionisation mass spectrometry.

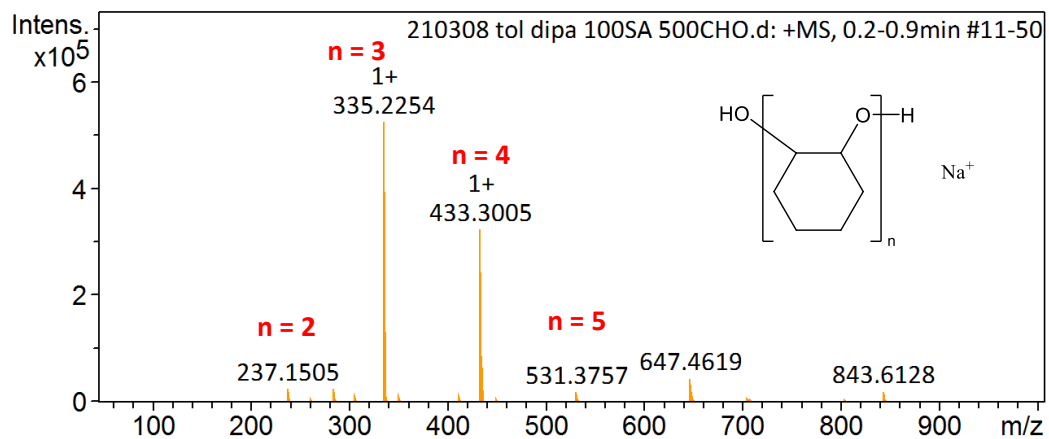

**Fig. S19** ESI-MS spectra of hydrolysed copolymer (Table 1, entry 9).

Cat.1 200SA 1000CHO

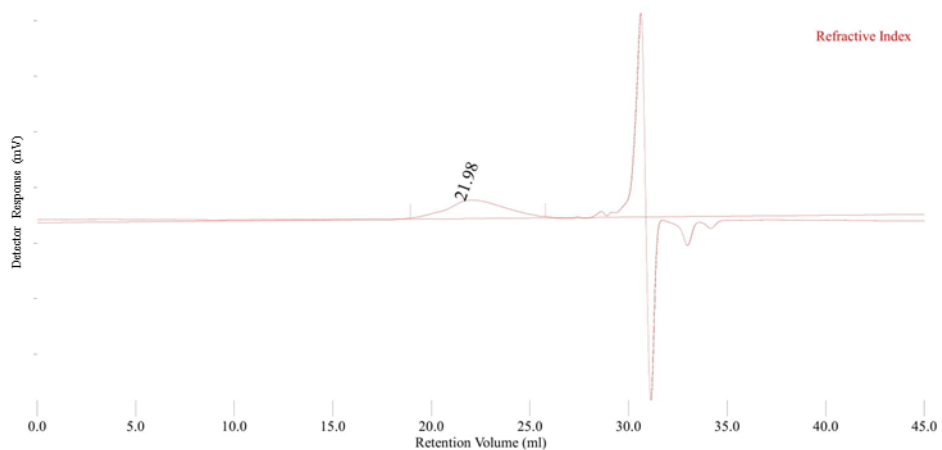

|                |        |
|----------------|--------|
| Peak RV - (ml) | 21.983 |
| Mn - (Daltons) | 4,323  |
| Mw - (Daltons) | 6,480  |
| Mz - (Daltons) | 9,205  |
| Mp - (Daltons) | 6,230  |
| Mw / Mn        | 1.499  |

**Fig. S20** GPC trace of isolated copolymer (Entry 1, Table 2).

Cat.2 200SA 1000CHO

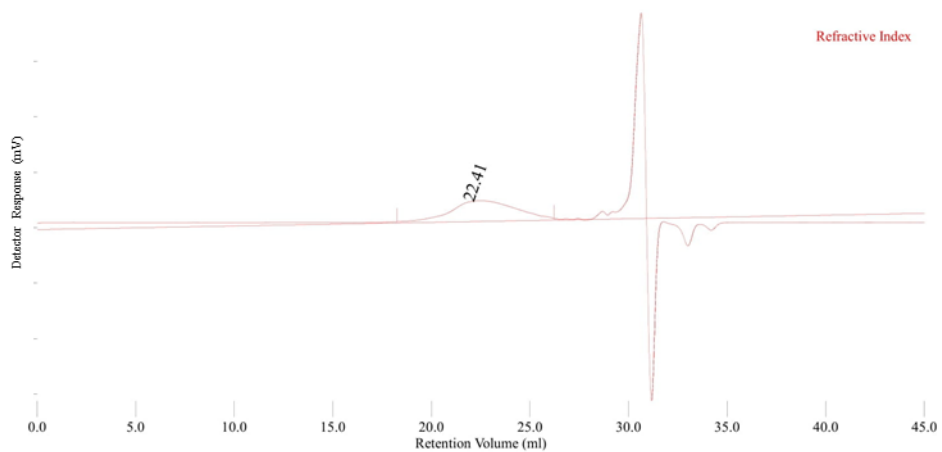

|                |        |
|----------------|--------|
| Peak RV - (ml) | 22.413 |
| Mn - (Daltons) | 3,505  |
| Mw - (Daltons) | 6,039  |
| Mz - (Daltons) | 10,457 |
| Mp - (Daltons) | 5,160  |
| Mw / Mn        | 1.723  |

**Fig. S21** GPC trace of isolated copolymer (Entry 2, Table 2).

Cat.3 200SA 1000CHO

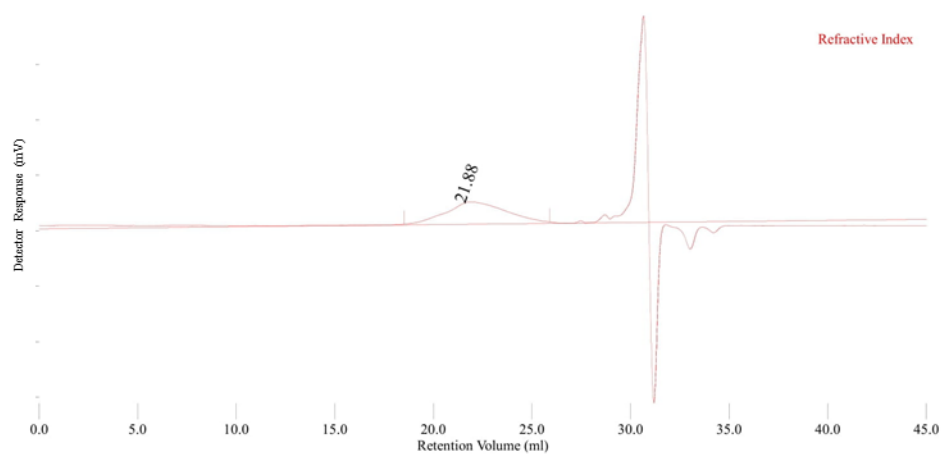

|                |        |
|----------------|--------|
| Peak RV - (ml) | 21.883 |
| Mn - (Daltons) | 4,395  |
| Mw - (Daltons) | 6,884  |
| Mz - (Daltons) | 10,203 |
| Mp - (Daltons) | 6,503  |
| Mw / Mn        | 1.566  |

**Fig. S22** GPC trace of isolated copolymer (Entry 3, Table 2).

Cat.4 200SA 1000CHO

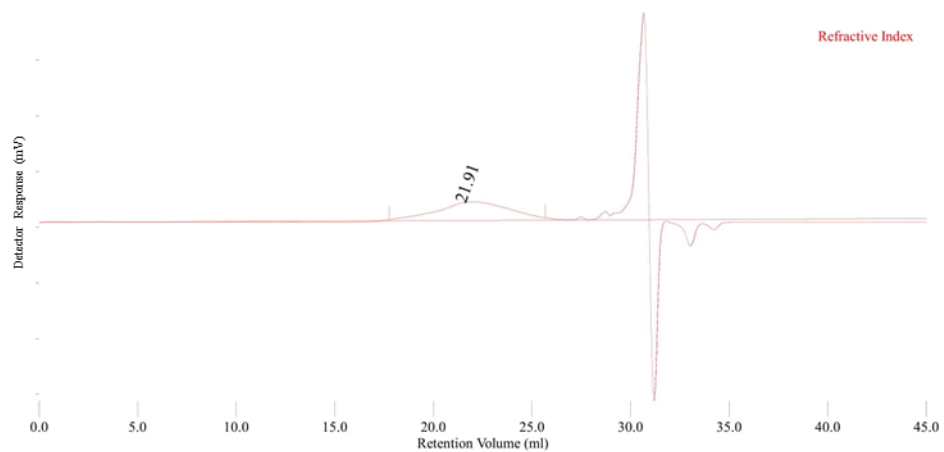

|                |        |
|----------------|--------|
| Peak RV - (ml) | 21.913 |
| Mn - (Daltons) | 4,623  |
| Mw - (Daltons) | 8,508  |
| Mz - (Daltons) | 15,743 |
| Mp - (Daltons) | 6,415  |
| Mw / Mn        | 1.840  |

**Fig. S23** GPC trace of isolated copolymer (Entry 4, Table 2).

Cat.5 200SA 1000CHO

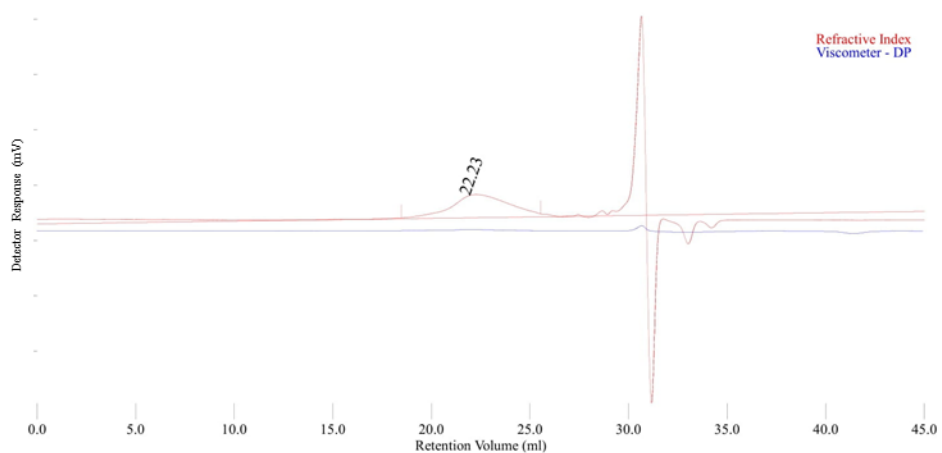

|                |        |
|----------------|--------|
| Peak RV - (ml) | 22.227 |
| Mn - (Daltons) | 4,884  |
| Mw - (Daltons) | 7,790  |
| Mz - (Daltons) | 12,392 |
| Mp - (Daltons) | 7,106  |
| Mw / Mn        | 1.595  |

Fig. S24 GPC trace of isolated copolymer (Entry 5, Table 2).

Cat.6 200SA 1000CHO

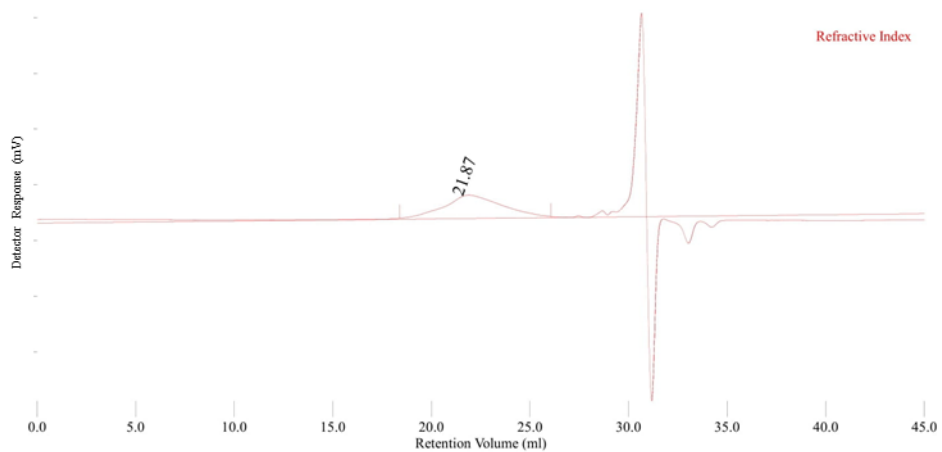

|                |        |
|----------------|--------|
| Peak RV - (ml) | 21.873 |
| Mn - (Daltons) | 4,420  |
| Mw - (Daltons) | 7,145  |
| Mz - (Daltons) | 10,923 |
| Mp - (Daltons) | 6,536  |
| Mw / Mn        | 1.616  |

Fig. S25 GPC trace of isolated copolymer (Entry 6, Table 2).

Cat.3 100SA 1000CHO

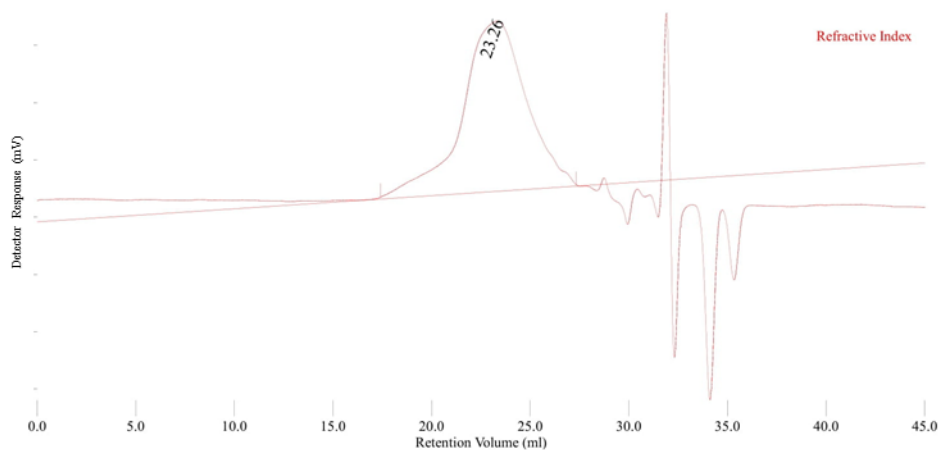

|                |        |
|----------------|--------|
| Peak RV - (ml) | 23.263 |
| Mn - (Daltons) | 3,642  |
| Mw - (Daltons) | 7,804  |
| Mz - (Daltons) | 19,959 |
| Mp - (Daltons) | 4,883  |
| Mw / Mn        | 2.142  |

**Fig. S26** GPC trace of isolated copolymer (Entry 7, Table 2).

Cat.3 400SA 1000CHO

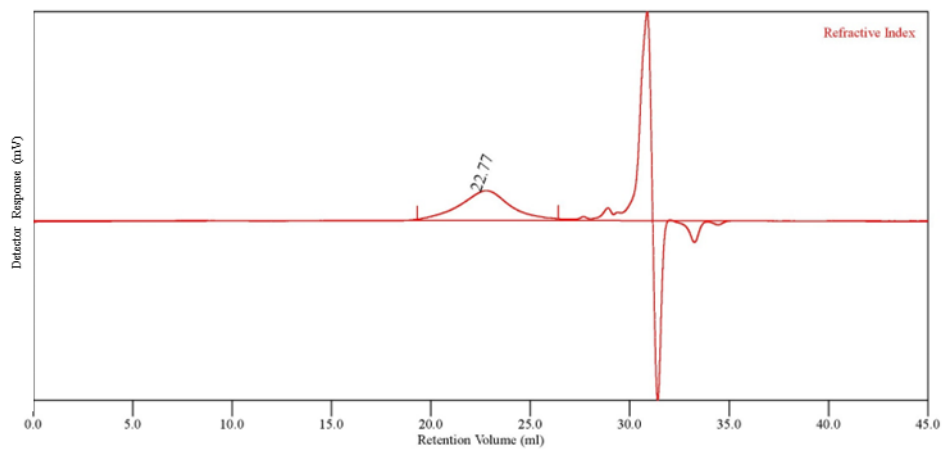

|                |        |
|----------------|--------|
| Peak RV - (ml) | 22.773 |
| Mn - (Daltons) | 3,544  |
| Mw - (Daltons) | 5,269  |
| Mz - (Daltons) | 7,334  |
| Mp - (Daltons) | 4,402  |
| Mw / Mn        | 1.487  |

**Fig. S27** GPC trace of isolated copolymer (Entry 8, Table 2).

Cat.3 100SA500CHOtoluene

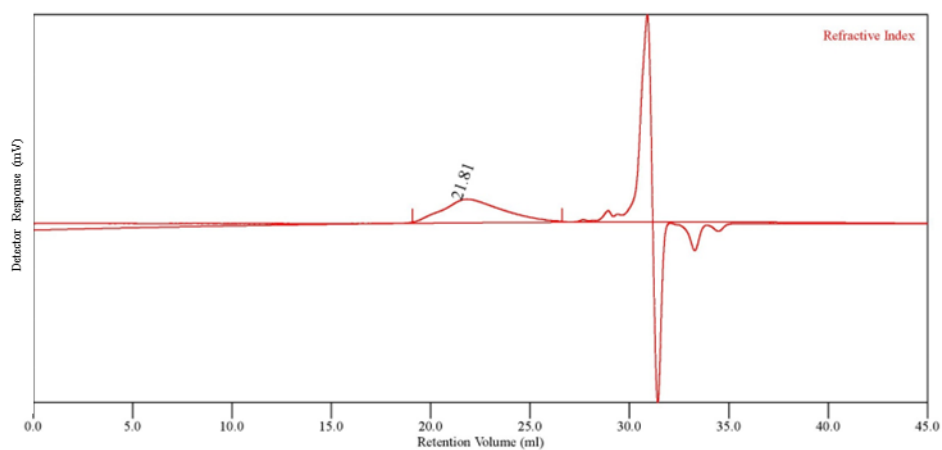

|                |        |
|----------------|--------|
| Peak RV - (ml) | 21.810 |
| Mn - (Daltons) | 4,063  |
| Mw - (Daltons) | 6,626  |
| Mz - (Daltons) | 9,285  |
| Mp - (Daltons) | 6,720  |
| Mw / Mn        | 1.631  |

Fig. S28 GPC trace of isolated copolymer (Entry 9, Table 2).

Cat.3 100SA 1000CHOtetrahydrofuran

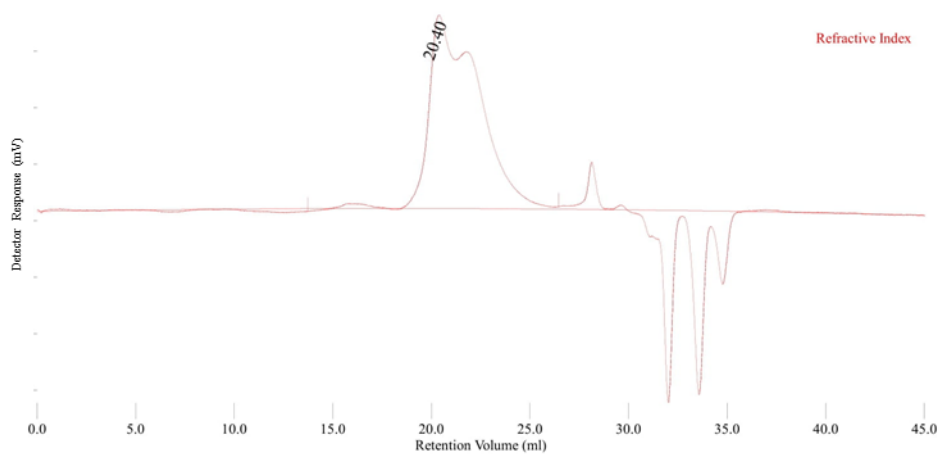

|                |        |
|----------------|--------|
| Peak RV - (ml) | 20.400 |
| Mn - (Daltons) | 6,399  |
| Mw - (Daltons) | 9,032  |
| Mz - (Daltons) | 11,505 |
| Mp - (Daltons) | 12,598 |
| Mw / Mn        | 1.411  |

Fig. S29 GPC trace of isolated terpolymer (Entry 1, Table 3).



Cat.3 1000CHO

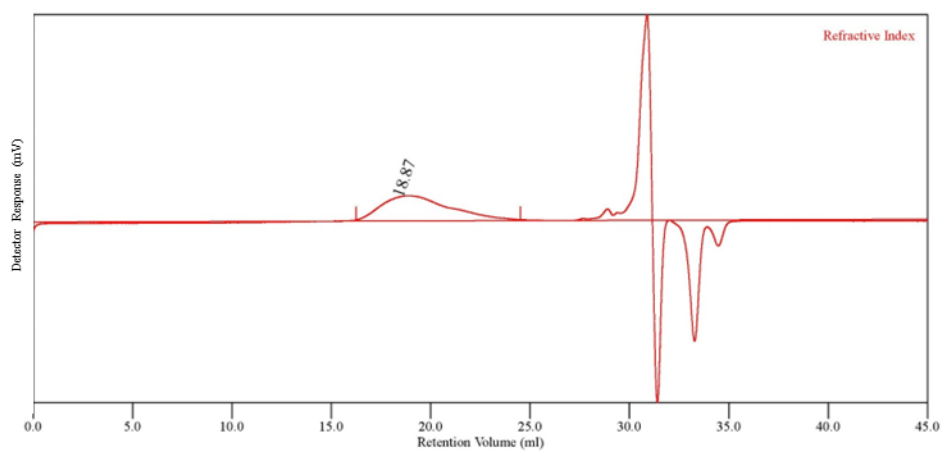

|                |        |
|----------------|--------|
| Peak RV - (ml) | 18.870 |
| Mn - (Daltons) | 14,152 |
| Mw - (Daltons) | 29,586 |
| Mz - (Daltons) | 52,872 |
| Mp - (Daltons) | 27,574 |
| Mw / Mn        | 2.090  |

**Fig. S30** GPC trace of isolated polymer (Entry 5, Table 3).
